# Supplementary material for: Impaired Heat Shock Protein Expression in Activated T Cells in B-Cell Lymphoma
Source: MDPI journal article supplement (doi:10.3390/biomedicines10112747), 2022-10-28
Supplement: s1 [file s1]

## Supplementary materials

### Supplementary Figure

A

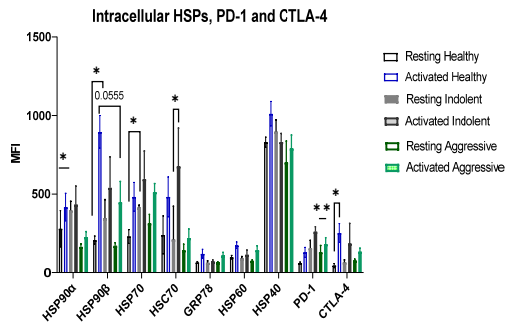

B

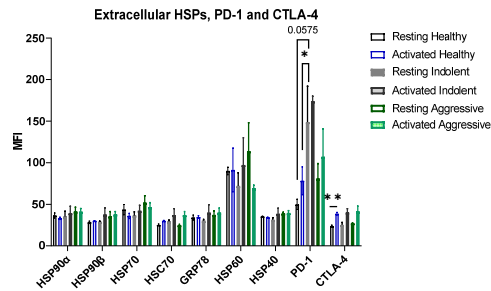

**Figure S1.** HSP, PD-1 and CTLA-4 expression in activated T cells. Intracellular (A) and extracellular (B) expression of HSPs, PD-1, CTLA-4 in resting and activated T cells in healthy controls and lymphoma patients.
